# Supplementary material
Source: publisher site journal article supplement (https://www.dovepress.com/article/512150)
Supplement: Supplementary file 1 [file 17_Mar_2025_Supplementary_Table_1.docx]

Table S1 Baseline Table of Study Population.

| GROUP | Control group | Observe group | P-value |
| --- | --- | --- | --- |
| N | 30 | 35 |  |
| AGE | 30.00 (29.00-31.00) | 30.00 (28.50-31.00) | 0.910 |
| GESTATIONAL_AGE | 35.00 (34.00-36.00) | 35.00 (35.00-35.00) | 0.837 |
| BMI | 24.53 (22.85-26.00) | 23.76 (22.52-25.55) | 0.709 |
| PREPARATION_TIME | 31.00 (28.00-33.75) | 22.00 (19.00-24.00) | <0.001 |
| RADIATION_DOSE | 9.89 (8.70-12.00) | 3.18 (2.64-3.71) | <0.001 |
| FLUOROSCOPY_TIME | 43.50 (38.25-47.00) | 10.00 (8.00-11.00) | <0.001 |
| SURGERY_DURATION | 149.00 (107.75-164.75) | 134.00 (108.00-154.00) | 0.439 |
| BLOOD_LOSS | 1097.65 (970.20-1535.25) | 860.27 (719.04-988.44) | <0.001 |
| FLUID_VOLUME | 801.40 (680.49-980.79) | 302.19 (210.99-482.74) | <0.001 |
| PT_PREOPERATIVE24H | 12.10 (11.88-12.44) | 11.97 (11.66-12.47) | 0.872 |
| PT_POSTOPERATIVE24H | 16.72 (15.94-17.56) | 14.72 (14.24-15.41) | <0.001 |
| APTTPREOPERATIVE24H | 29.21 (27.86-31.75) | 30.62 (28.24-31.97) | 0.814 |
| APTTPOSTOPERATIVE24H | 38.05 (35.35-39.45) | 34.82 (32.98-36.59) | 0.002 |
| FIB_PREOPERATIVE24H | 2.84 (2.25-3.11) | 2.78 (2.27-3.06) | 0.838 |
| FIB_POSTOPERATIVE24H | 1.86 (1.69-2.02) | 2.34 (2.12-2.77) | <0.001 |
| UTERINE_INCISION_CLOSURE |  |  | 0.009 |
| NO | 21 (70.00%) | 33 (94.29%) |  |
| YES | 9 (30.00%) | 2 (5.71%) |  |
| POSTPARTUM_HEMORRHAGE |  |  | 0.518 |
| NO | 27 (90.00%) | 33 (94.29%) |  |
| YES | 3 (10.00%) | 2 (5.71%) |  |
| NEONATAL_OUTCOME |  |  | 0.466 |
| NO | 28 (93.33%) | 34 (97.14%) |  |
| YES | 2 (6.67%) | 1 (2.86%) |  |

Note: Continuous variables are represented by median (Q1-Q3); Categorical variables are expressed as N (percentage).
